# Supplementary material
Source: PubMed Central journal article supplement (PMC4183271)
Supplement: pnas.201408839SI.pdf [file pnas.201408839SI.pdf]

# Supporting Information

Duque-Correa et al. 10.1073/pnas.1408839111

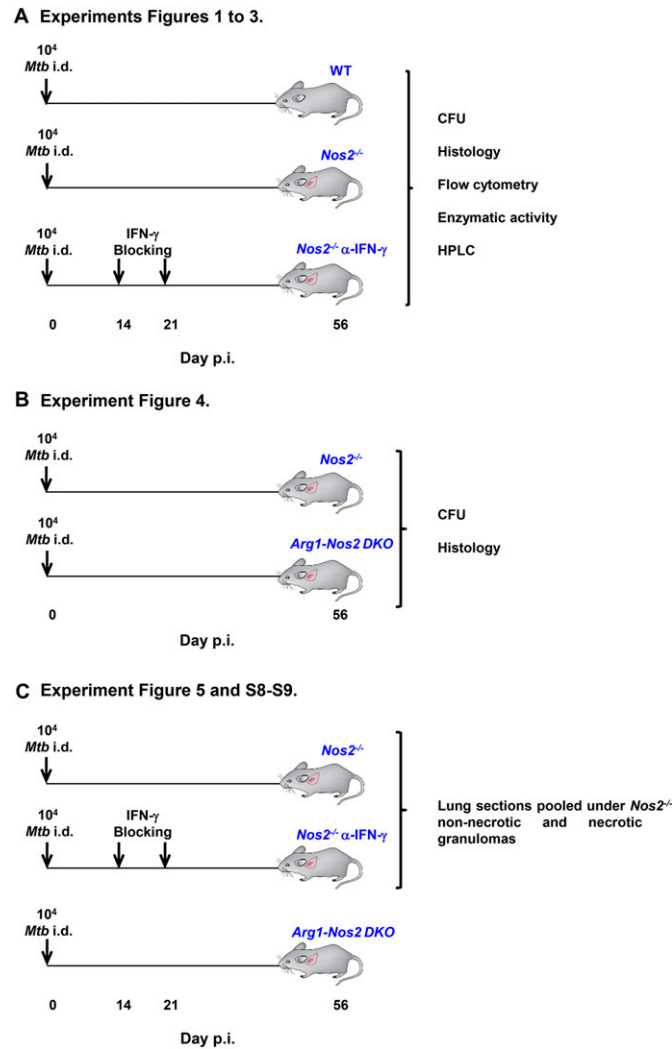

**Fig. S1.** Experimental strategies used throughout the study. (A) The granuloma model of nitric oxide synthase-2-deficient (*Nos2*<sup>-/-</sup>) mice dermally infected with *Mycobacterium tuberculosis* (*Mtb*): WT and *Nos2*<sup>-/-</sup> mice were infected intradermally with 10<sup>4</sup> *Mtb*. At days 14 and 21 postinfection (p.i.), *Nos2*<sup>-/-</sup> mice received 500 μg anti-IFN-γ i.p. or remained untreated. Mice were killed at day 56 p.i., and tissues were used for further analysis. (B) *Nos2*<sup>-/-</sup> and arginase-1 (*Arg1*)-*Nos2* double knockout (DKO) mice were infected intradermally with 10<sup>4</sup> *Mtb*. Mice were killed at day 56 p.i., and tissues were used to assess bacterial burden and for histological analysis. (C) *Nos2*<sup>-/-</sup> and *Arg1-Nos2* DKO mice were infected intradermally with 10<sup>4</sup> *Mtb*. At days 14 and 21 p.i. *Nos2*<sup>-/-</sup> mice received 500 μg anti-IFN-γ i.p. or remained untreated. Mice were killed at day 56 p.i., and tissues were used for histological analysis. To increase the number of nonnecrotic and necrotic granulomas from *Nos2*<sup>-/-</sup> mice, lung sections from *Nos2*<sup>-/-</sup> and IFN-γ-blocked *Nos2*<sup>-/-</sup> mice were pooled.



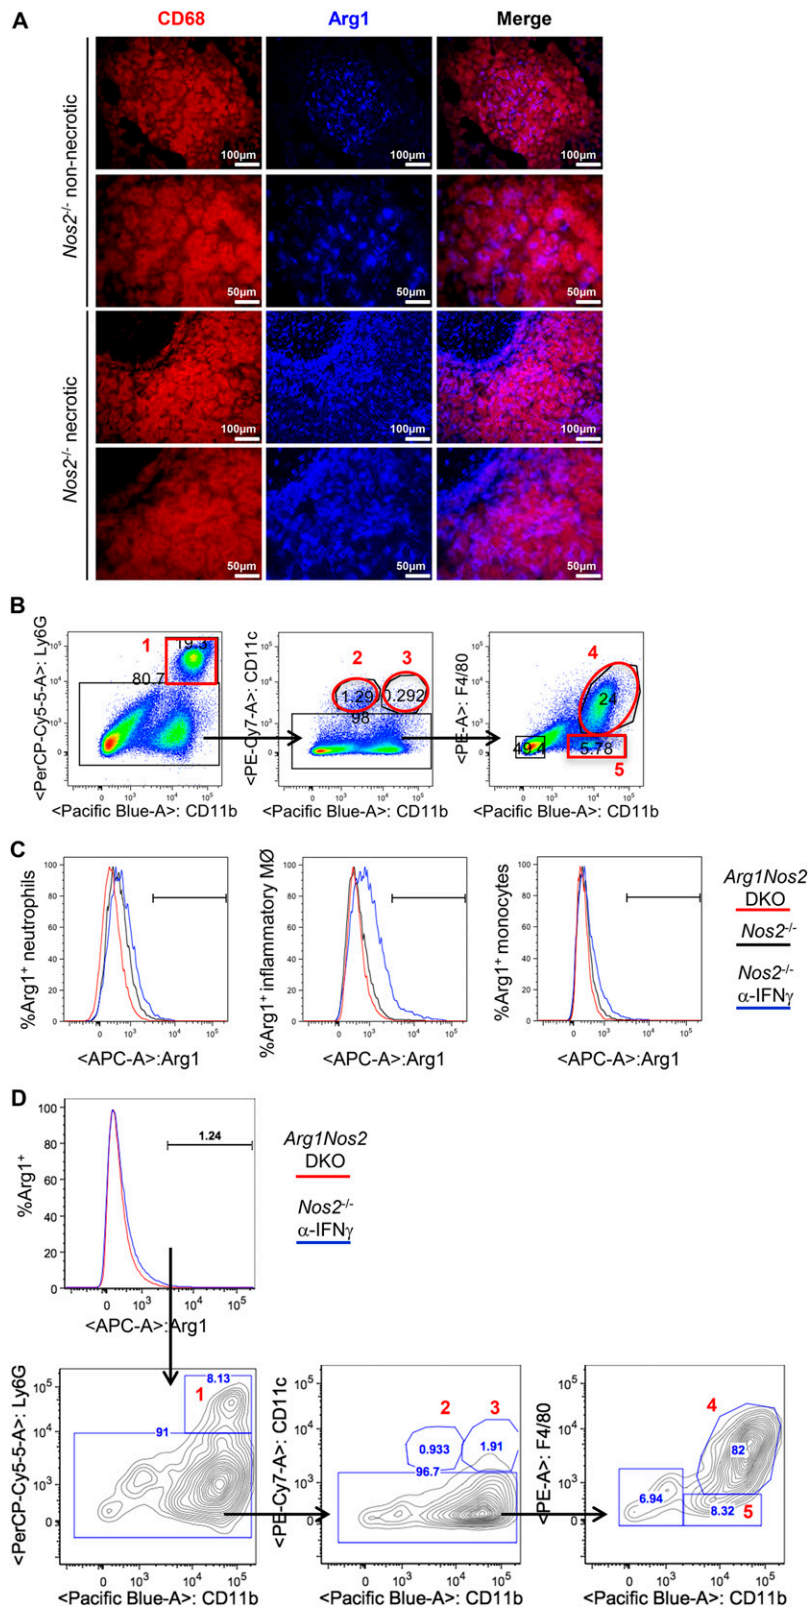

**Fig. 54.** Macrophages are the main cell type expressing Arg1 in lungs from infected *Nos2*<sup>-/-</sup> mice. (A) Representative nonnecrotic and necrotic TB lung granulomas from infected *Nos2*<sup>-/-</sup> mice at day 56 p.i. stained with anti-CD68 (red) and anti-Arg1 (blue). Staining shows colocalization of Arg1<sup>+</sup> cells and CD68<sup>+</sup> cells indicating that Arg1 is expressed in macrophages in TB lung granulomas. (B) Gating strategy used to characterize phagocytic cell populations of the lungs of infected *Nos2*<sup>-/-</sup> and IFN- $\gamma$ -blocked *Nos2*<sup>-/-</sup> mice. Populations: 1, neutrophils; 2, alveolar macrophages; 3, dendritic cells; 4, inflammatory macrophages; 5, monocytes. (C) Histograms representative of Arg1 expression in neutrophils, inflammatory macrophages, and monocytes. The red line depicts *Arg1-Nos2* DKO mice, the black line represents *Nos2*<sup>-/-</sup> mice, and the blue line represents IFN- $\gamma$ -blocked *Nos2*<sup>-/-</sup> mice. (D) Alternative gating strategy for characterization of Arg1-expressing cell populations in the lungs of infected *Nos2*<sup>-/-</sup> and IFN- $\gamma$ -blocked *Nos2*<sup>-/-</sup> mice. Arg1<sup>+</sup> cells are gated in the leukocyte population, and then the populations expressing Arg1 are identified as in B.



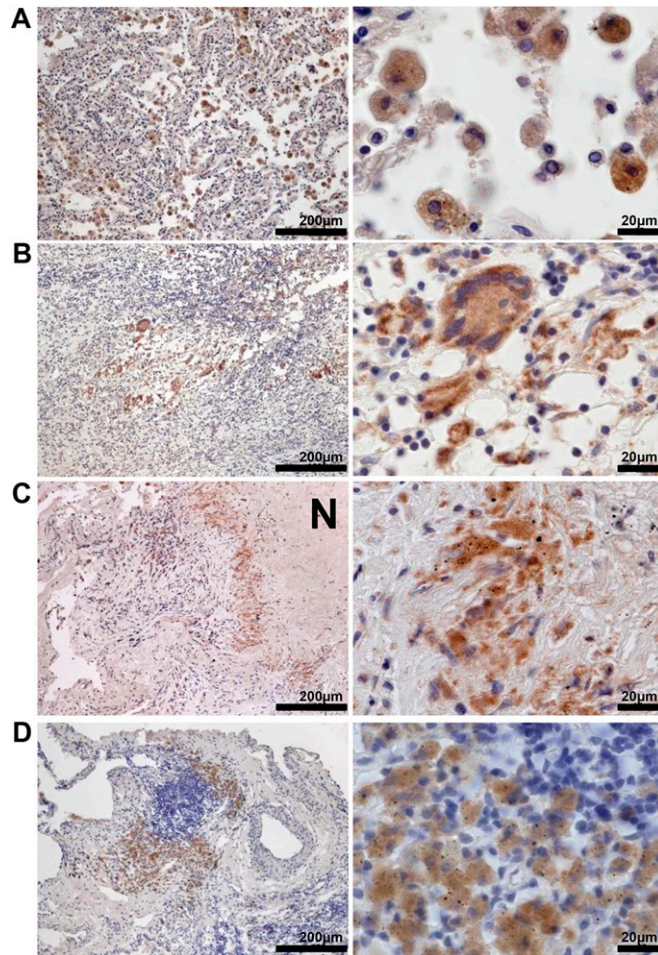

**Fig. S5.** Arg1 is expressed in human lung tissue of TB patients. Human lung samples taken from patients with TB stained with anti-Arg1 mAb. (A and B) Pericavity lung tissue. (C) Cavity wall lung tissue. (D) Distal lung tissue. N, necrotic.



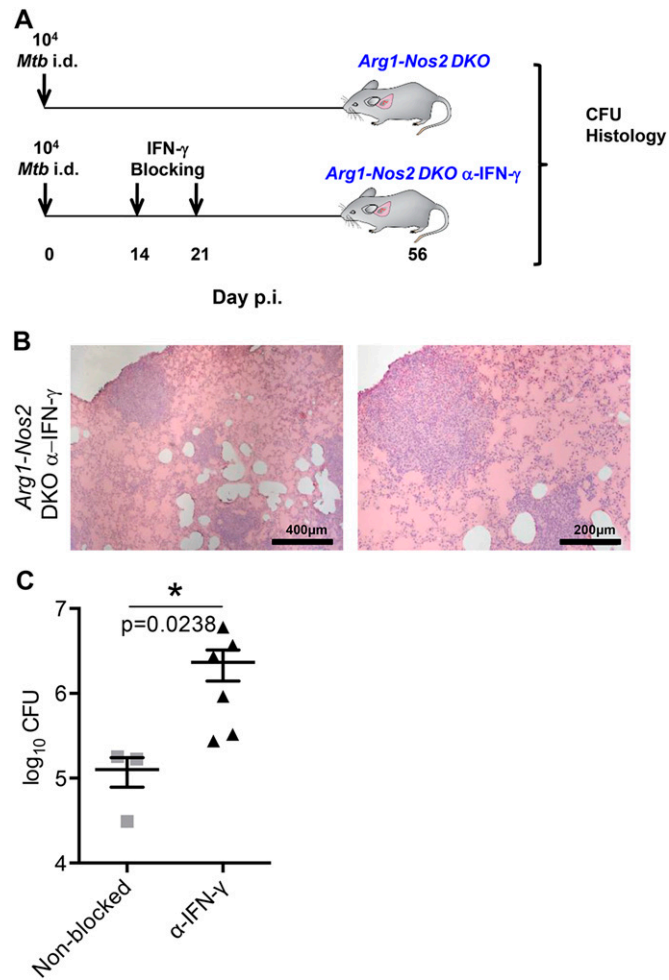

**Fig. S7.** Blocking of IFN- $\gamma$  in infected *Arg1-Nos2* DKO mice exacerbates *Mtb* growth and pathology in TB lung granulomas. (A) Experimental strategy to evaluate the effect of IFN- $\gamma$  blocking in infected *Arg1-Nos2* DKO mice: *Arg1-Nos2* DKO mice were infected intradermally with 10<sup>4</sup> *Mtb*. At days 14 and 21 p.i., mice received 500  $\mu$ g anti-IFN- $\gamma$  i.p. or remained untreated. Mice were killed at day 56 p.i., and tissues were used for bacterial burden and histological analysis. (B) H&E staining of lung tissue from infected IFN- $\gamma$ -blocked *Arg1-Nos2* DKO mice at day 56 p.i. (C) Lung cfus from infected, nonblocked *Arg1-Nos2* DKO ( $n = 3$ ) and IFN- $\gamma$ -blocked *Arg1-Nos2* DKO ( $n = 6$ ) mice at day 56 p.i. Data show the median and interquartile range. Significance was assessed by the Mann-Whitney test.

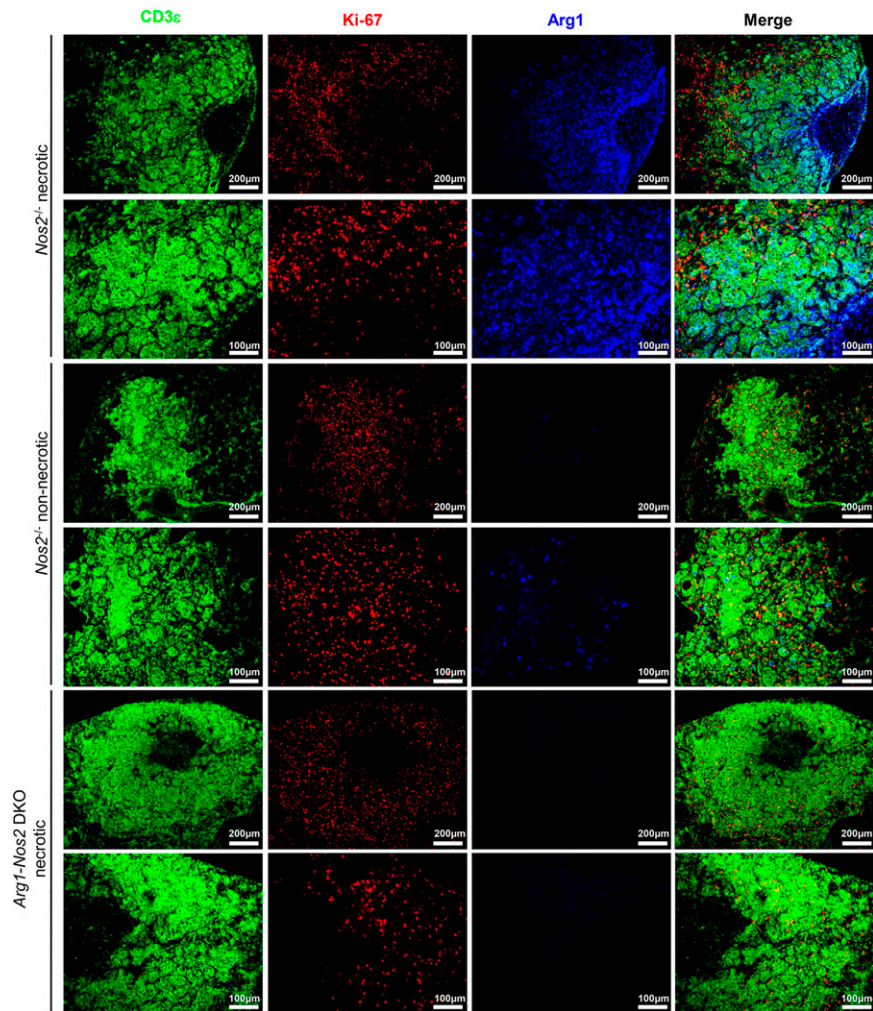

**Fig. 58.** Proximity of Arg1<sup>+</sup> cells affects T-cell proliferation in microenvironments within granulomas. Arg1, Ki-67, and CD3ε immunofluorescence staining of representative nonnecrotic and necrotic TB lung granulomas from infected *Nos2*<sup>-/-</sup> and *Arg1-Nos2* DKO mice at day 56 p.i.
